# Supplementary material
Source: PubMed Central journal article supplement (PMC3607428)

Supplemental Figure 1.

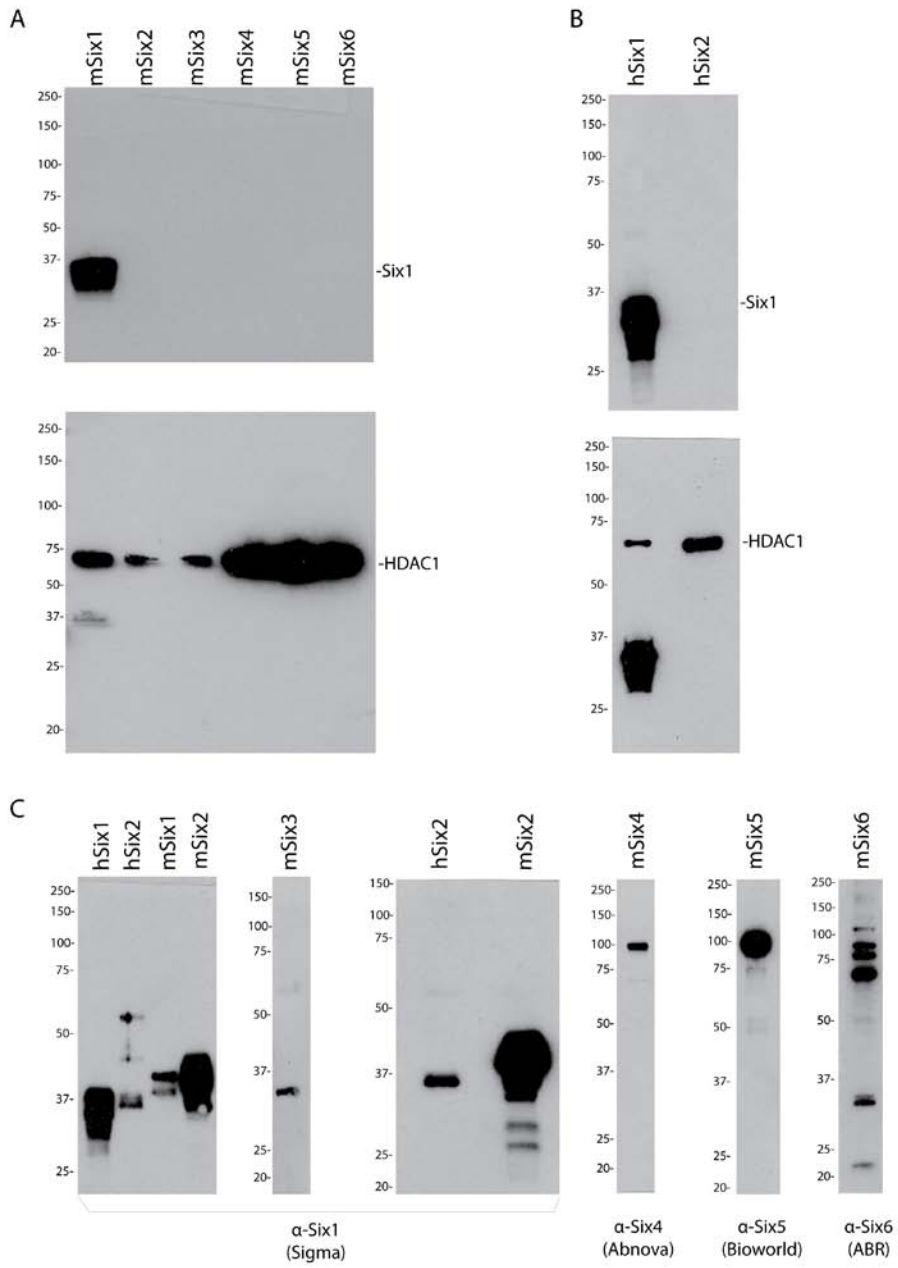

Supplement: NIHMS363719-supplement-01.pdf [file NIHMS363719-supplement-01.pdf]

Supplemental Figure 2

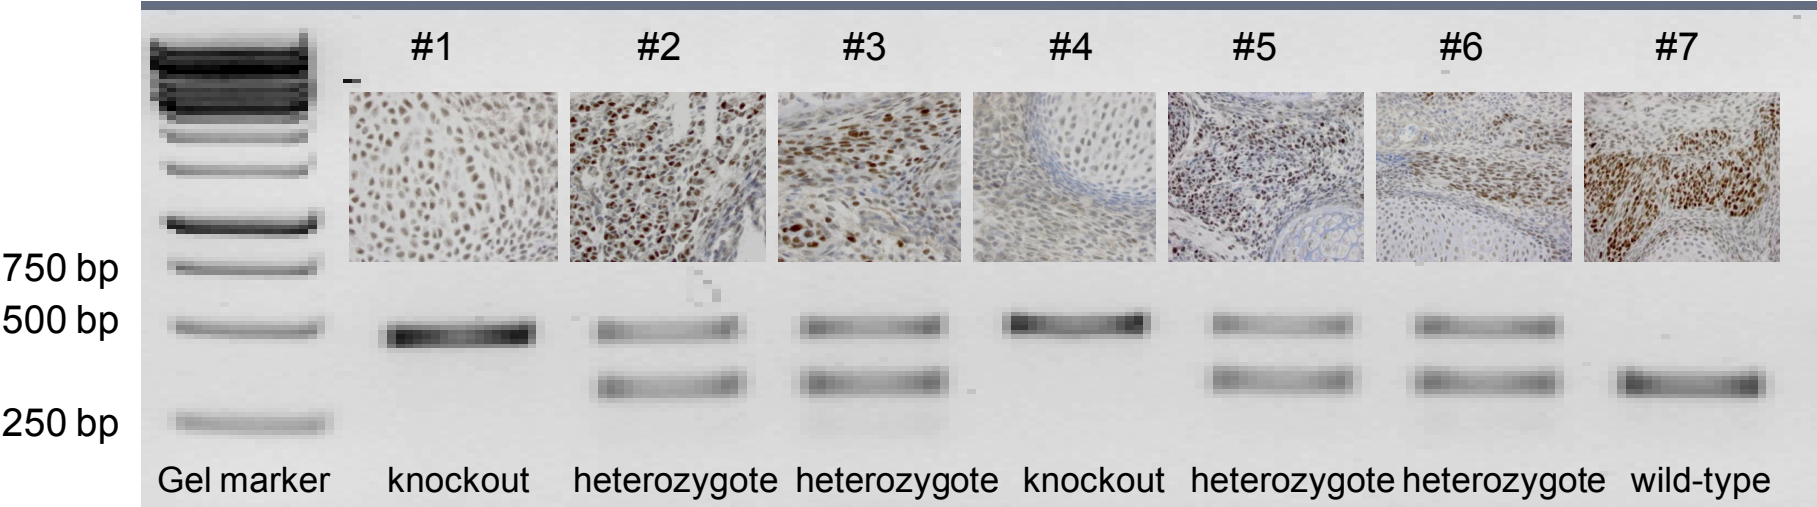

Supplement: NIHMS363719-supplement-02.pdf [file NIHMS363719-supplement-02.pdf]

Supplemental Figure 3.

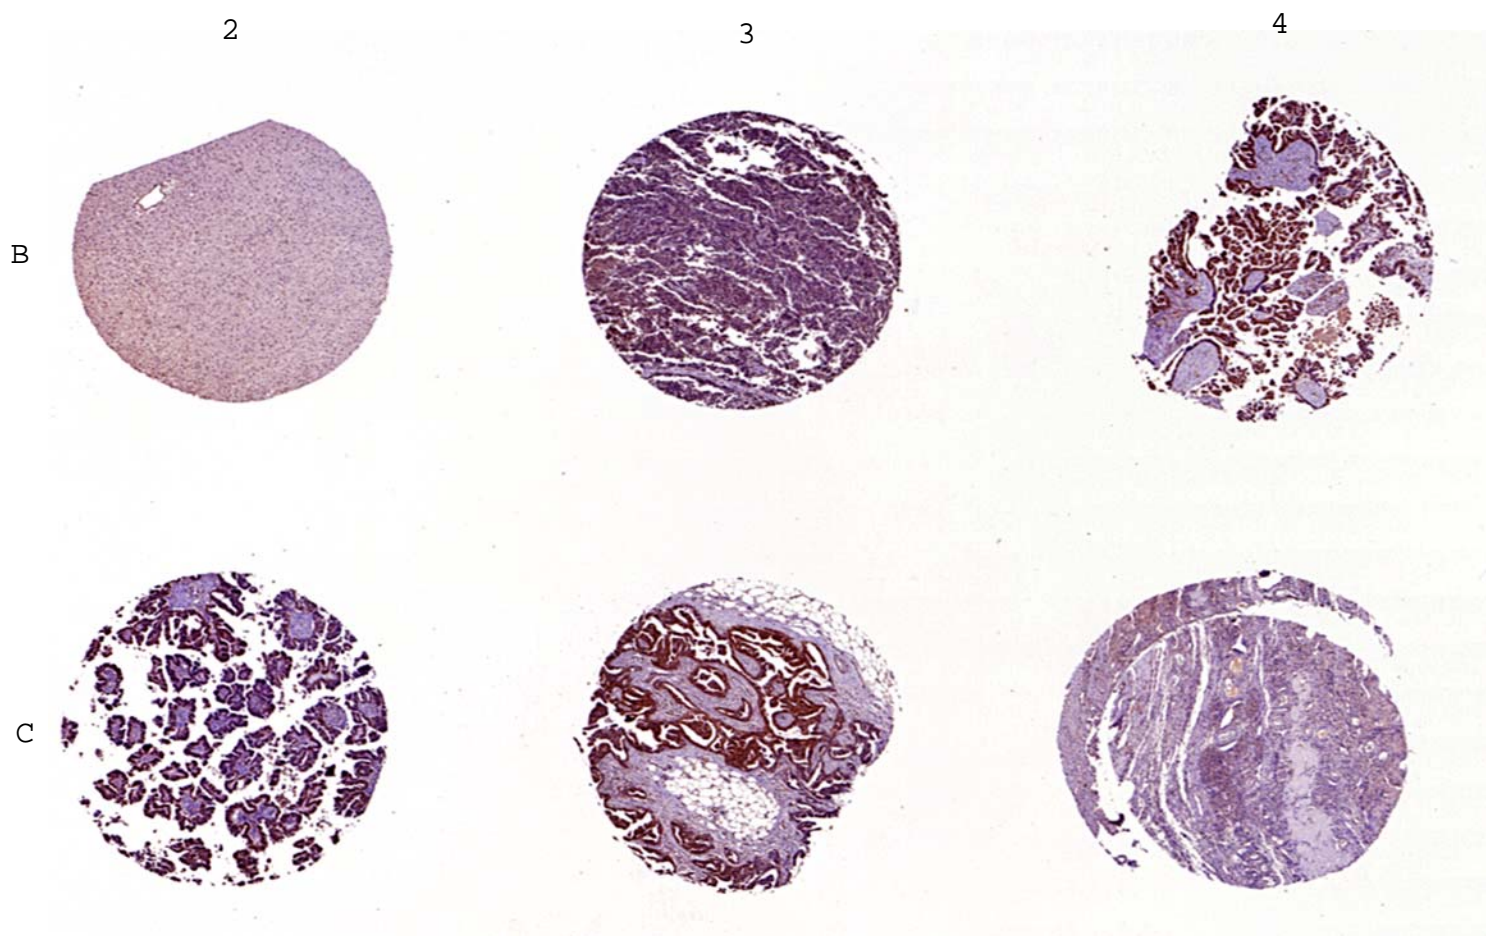

Supplement: NIHMS363719-supplement-03.pdf [file NIHMS363719-supplement-03.pdf]

Supplemental Figure 4.

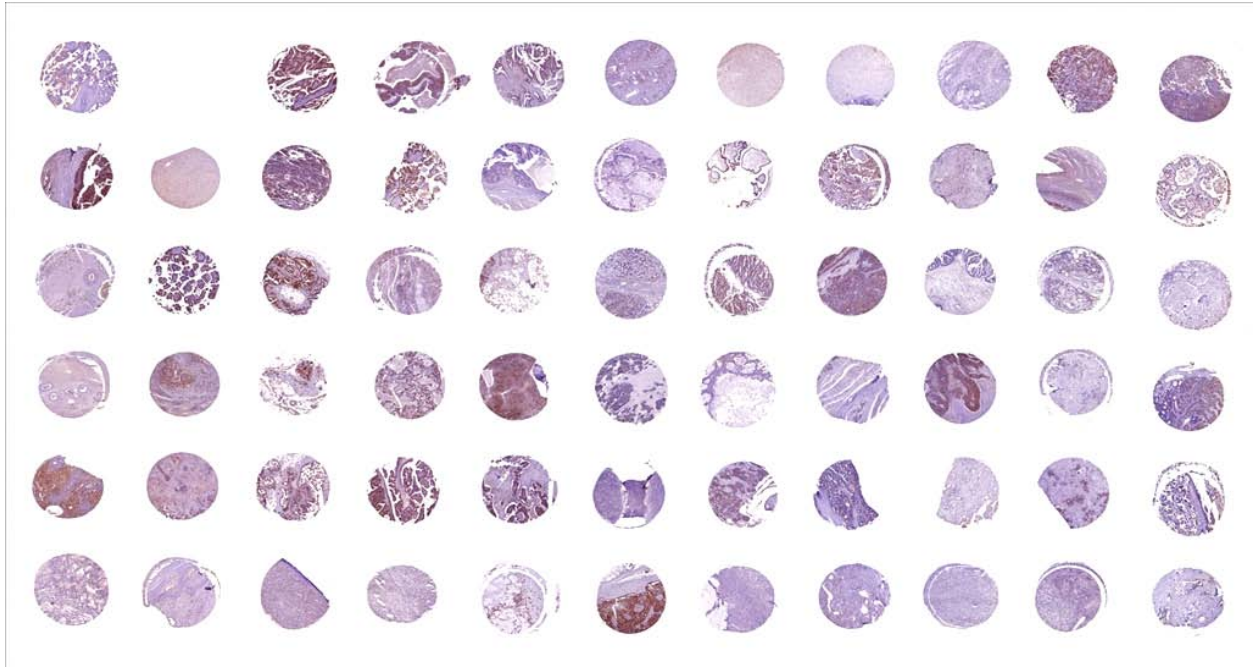

|       |       |       |       |       |       |       |   |       |          |       |
|-------|-------|-------|-------|-------|-------|-------|---|-------|----------|-------|
| 0     |       | 0     | 1+/10 | 0     | 0     | 0     | 0 | 0     | 1+/80%   | 0     |
| 0     |       | 0     | 2+/5  | 0     | 0     | 0     | 0 | 0     | 0 (cyto) | 0     |
| 0     | 0     | 0     | 1+/80 | 0     | 0     | 1+/75 | 0 | 0     | 1+/5     | 1+/50 |
| 0     | 0     | 0     | 2+/10 | 0     | 0     | 2+/75 | 0 | 0     | 0        | 1+/5  |
| 0     | 0     | 1+/5  | 0     | 0     | 0     | 1+/5  | 0 | 0     | 0        | 0     |
| 0     | 1+/5  | 1+/5  | 0     | 0     | 1+/5  | 0     | 0 | 0     | 0        | 0     |
| 0     | 1+/30 | 1+/10 | 0     | 1+/5  | 1+/20 | 0     | 0 | 1+/80 | 0        | 1+/5  |
| 0     | 1+/5  | 1+/5  | 1+/5  | 0     | 2+/40 | 0     | 0 | 1+/60 | 0        | 0     |
| 2+/80 | 0     | 0     | 1+/5  | 0     | 0     | 0     | 0 | 0     | 1+/5     | 0     |
| 2+/90 | 0     | 0     | 1+/5  | 1+/10 | 0     | 0     | 0 | 0     | 1+/5     | 0     |
| 0     | 0     | 0     | 0     | 1+/10 | 2+/50 | 0     | 0 | 0     | 0        | 3+/50 |
| 0     | 0     | 0     | 0     | 0     | 2+/80 | 0     | 0 | 0     | 0        | 2+/80 |

Supplement: NIHMS363719-supplement-04.pdf [file NIHMS363719-supplement-04.pdf]

Supplemental Figure 5.

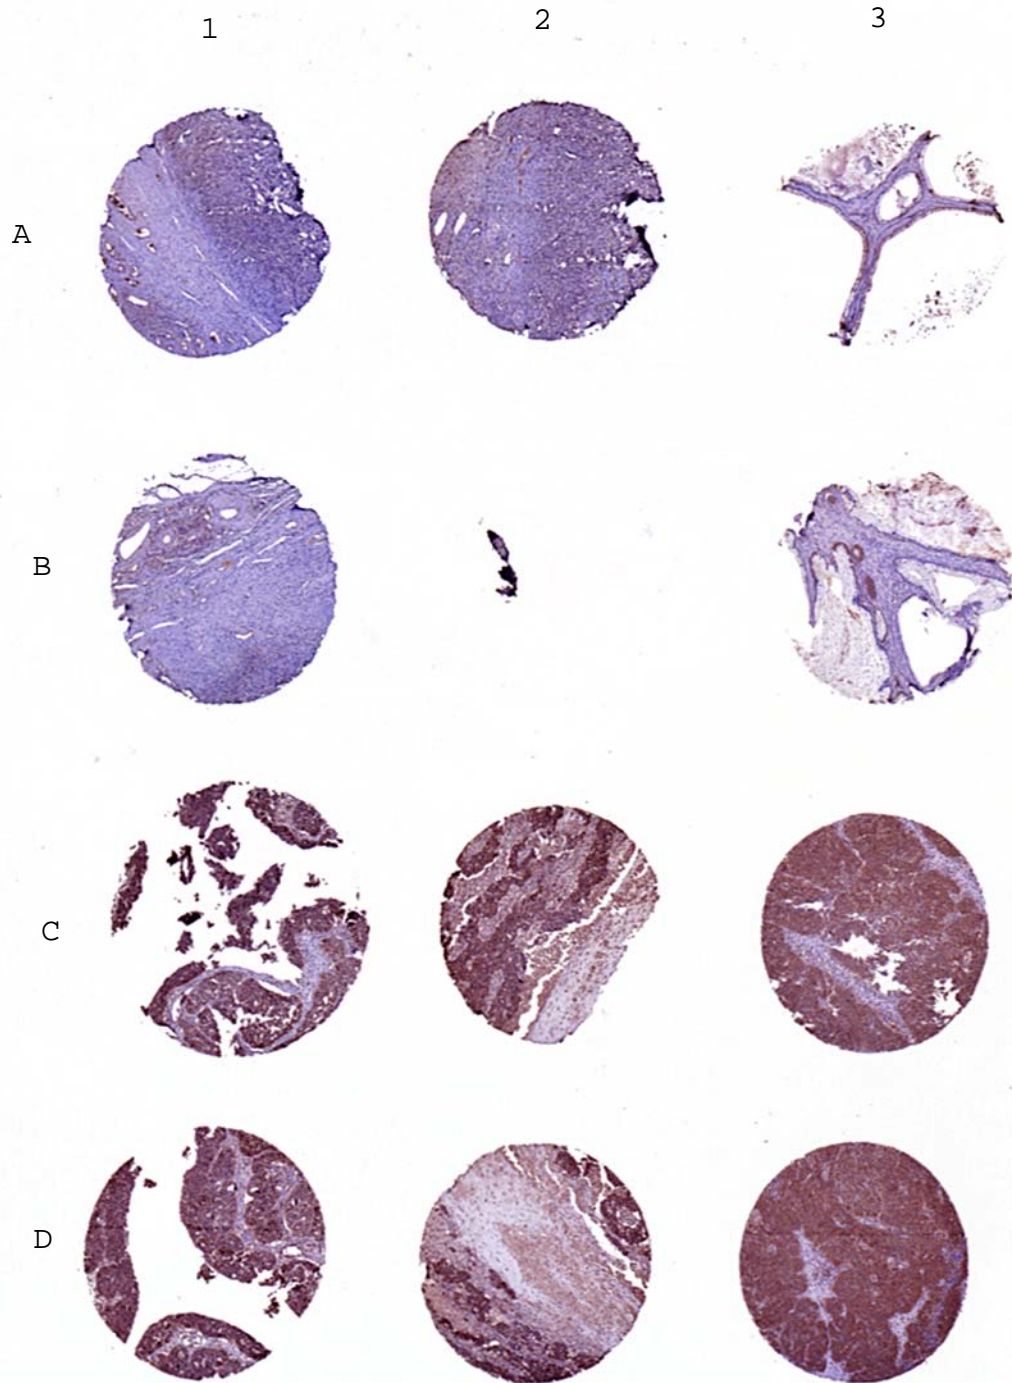

Supplement: NIHMS363719-supplement-05.pdf [file NIHMS363719-supplement-05.pdf]

Supplemental Figure 6.

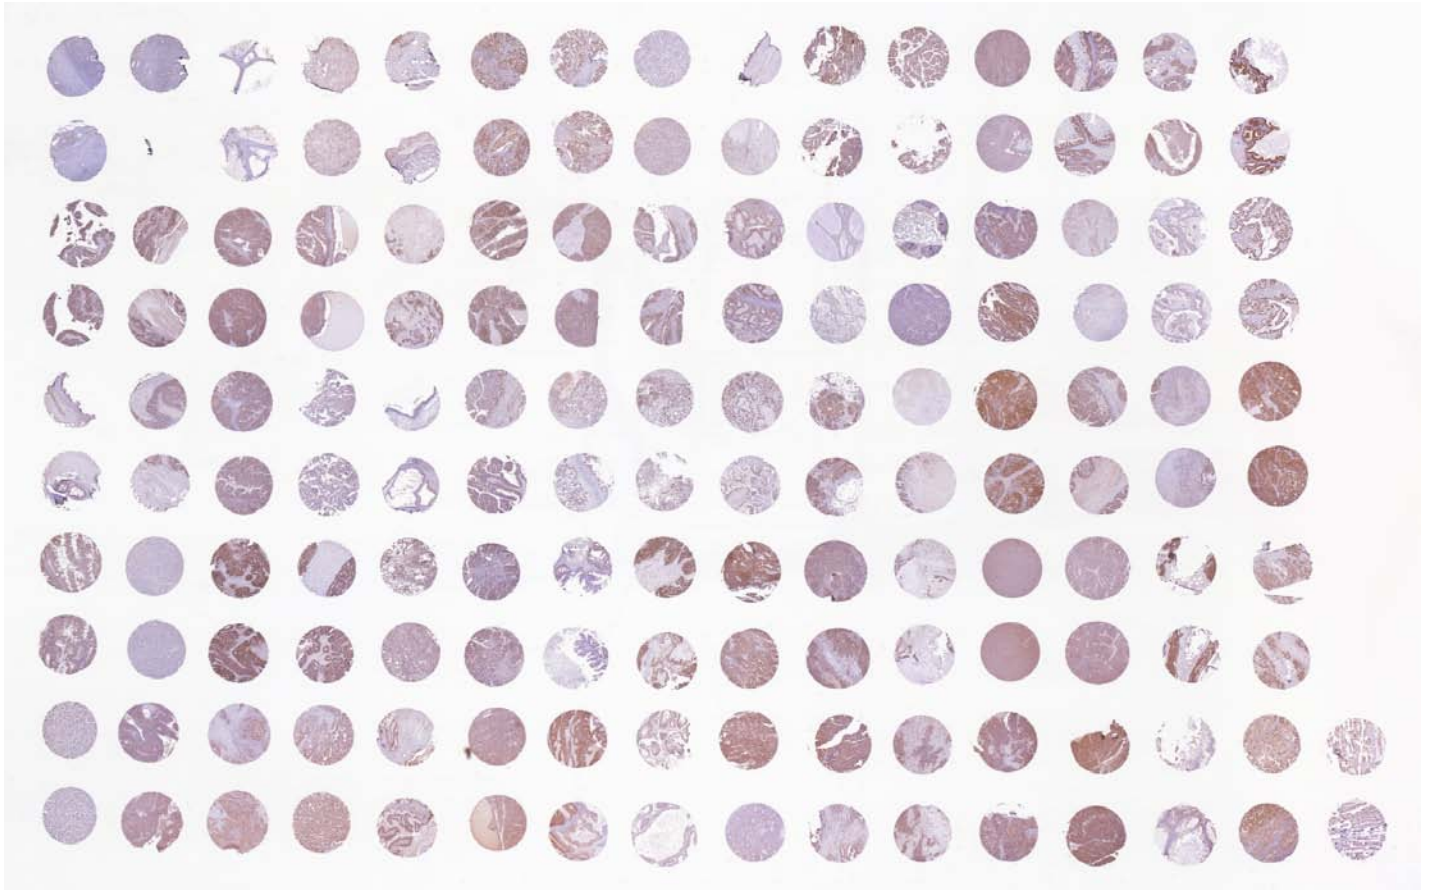

|       |       |       |       |       |       |       |       |       |       |       |       |       |       |       |   |
|-------|-------|-------|-------|-------|-------|-------|-------|-------|-------|-------|-------|-------|-------|-------|---|
| 0     | 0     | 0     | 0     | 2+/10 | 1+/20 | 1+/20 | 0     | 0     | 1+/50 | 1+/10 | 0     | 0     | 1+/5  | 2+/20 |   |
| 0     | 0     | 2+/5  | 0     | 2+/10 | 1+/5  | 1+/5  | 0     | 0     | 2+/10 | 0     | 0     | 0     | 1+/5  | 2+/10 |   |
| 0     |       | 0     | 0     | 0     | 1+/10 | 1+/30 | 0     | 0     | 1+/30 | 1+/5  | 0     | 0     | 1+/10 | 2+/20 |   |
| 0     |       | 1+/5  | 0     | 0     | 2+/10 | 1+/20 | 0     | 0     | 1+/5  | 0     | 0     | 0     | 1+/5  | 2+/10 |   |
| 1+/5  | 1+/5  | 1+/5  | 0     | 1+/5  | 3+/80 | 2+/30 | 2+/50 | 1+/10 | 0     | 2+/10 | 1+/30 | 1+/5  | 1+/40 | 1+/50 |   |
| 2+/10 | 1+/5  | 1+/5  | 0     | 2+/5  | 3+/80 | 2+/10 | 2+/30 | 2+/5  | 0     | 2+/30 | 1+/5  | 0     | 1+/50 | 2+/15 |   |
| 3+/10 | 0     | 1+/5  | 3+/1  | 2+/10 | 3+/80 | 2+/30 | 2+/50 | 1+/10 | 0     | 2+/10 | 1+/30 | 0     | 1+/30 | 1+/30 |   |
| 3+/80 | 0     | 1+/10 | 3+/5  | 1+/5  | 3+/80 | 2+/20 | 2+/50 | 1+/10 | 1+/5  | 2+/40 | 2+/10 | 0     | 1+/50 | 2+/5  |   |
| 1+/5  | 1+/5  | 1+/5  | 0     | 0     | 1+/20 | 0     | 2+/10 | 2+/20 | 1+/5  | 0     | 2+/50 | 1+/5  | 1+/10 | 1+/30 |   |
| 1+/5  | 1+/10 | 0     | 0     | 0     | 2+/5  | 0     | 1+/10 | 2+/10 | 0     | 0     | 1+/15 | 0     | 1+/5  | 1+/5  |   |
| 1+/5  | 1+/40 | 1+/5  | 0     | 0     | 1+/20 | 0     | 1+/10 | 2+/10 | 1+/5  | 1+/5  | 2+/10 | 0     | 1+/5  | 1+/40 |   |
| 1+/5  | 1+/5  | 0     | 0     | 0     | 0     | 0     | 0     | 2+/30 | 1+/5  | 1+/5  | 2+/10 | 0     | 1+/10 | 1+/5  |   |
| 1+/5  | 0     | 1+/10 | 0     | 1+/5  | 1+/5  | 0     | 3+/40 | 1+/80 | 1+/20 | 1+/10 | 0     | 1+/30 | 1+/10 | 1+/5  |   |
| 0     | 0     | 1+/5  | 0     | 2+/5  | 0     | 0     | 3+/50 | 1+/10 | 0     | 2+/10 | 1+/5  | 2+/10 | 1+/5  | 1+/5  |   |
| 1+/5  | 0     | 1+/5  | 0     | 1+/20 | 0     | 0     | 3+/90 | 1+/5  | 1+/5  | 1+/10 | 0     | 2+/30 | 1+/5  | 1+/5  |   |
| 0     | 0     | 1+/5  | 0     | 3+/30 | 0     | 0     | 3+/50 | 0     | 2+/5  | 1+/5  | 1+/5  | 2+/5  | 1+/5  | 1+/5  |   |
| 1+/5  | 0     | 2+/5  | 1+/5  | 1+/5  | 1+/40 | 1+/50 | 1+/50 | 2+/10 | 2+/50 | 1+/5  | 1+/5  | 1+/30 | 1+/5  | 2+/80 | 0 |
| 0     | 0     | 1+/10 | 1+/5  | 1+/5  | 1+/50 | 1+/50 | 1+/50 | 2+/30 | 2+/40 | 2+/10 | 1+/5  | 1+/10 | 1+/5  | 2+/60 | 0 |
| 0     | 2+/10 | 2+/50 | 1+/5  | 1+/5  | 1+/40 | 1+/20 | 0     | 0     | 1+/5  | 1+/20 | 1+/20 | 1+/50 | 1+/5  | 2+/30 | 0 |
| 0     | 0     | 2+/10 | 2+/10 | 1+/5  | 1+/50 | 0     | 0     | 0     | 0     | 1+/15 | 1+/5  | 1+/20 | 1+/30 | 2+/10 | 0 |

Supplement: NIHMS363719-supplement-06.pdf [file NIHMS363719-supplement-06.pdf]
